# Supplementary material for: Calcium ion-assisted lipid tubule formation
Source: Royal Society of Chemistry journal article supplement (doi:10.1039/c7qm00521k), 2018-01-01
Supplement: c7qm00521k1.pdf [file c7qm00521k1.pdf]

## Supporting Information

# Calcium Ion-Assisted Lipid Tubule Formation

*Sandra Jones, An Huynh, Yuan Gao and Yan Yu\**

Department of Chemistry, Indiana University, Bloomington, Indiana 47405, United  
States

Email: [yy33@indiana.edu](mailto:yy33@indiana.edu)

### **Contents**

Supplementary Figures S1-S3

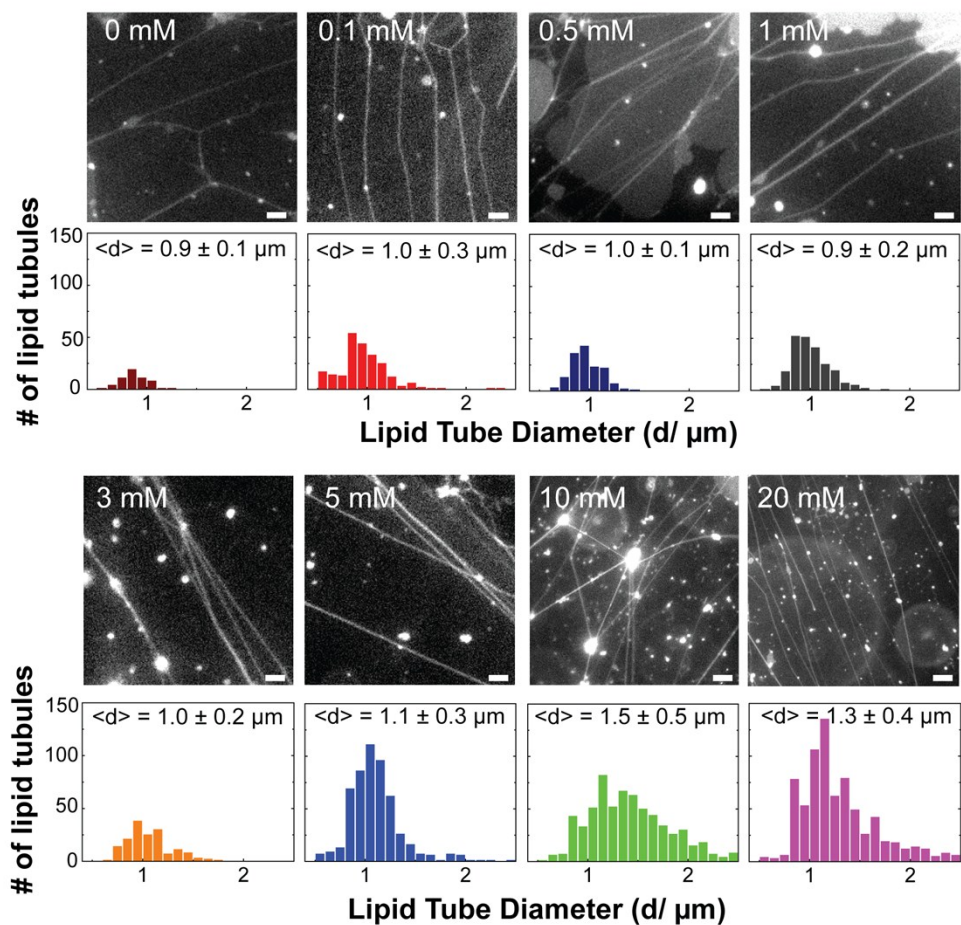

**Figure S1.** Fluorescence images of lipid tubules and histograms showing the distribution of lipid tubule diameters (ave.±s.d.) at different calcium concentrations at indicated. Scale bars: 5 μm.

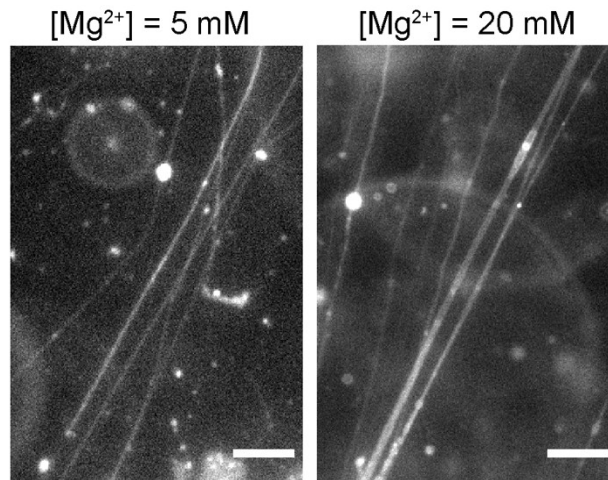

**Figure S2.** Fluorescence images showing lipid tubule formation at  $[Mg^{2+}] = 5 \text{ mM}$  and  $20 \text{ mM}$ . Scale bars:  $10 \mu\text{m}$ .

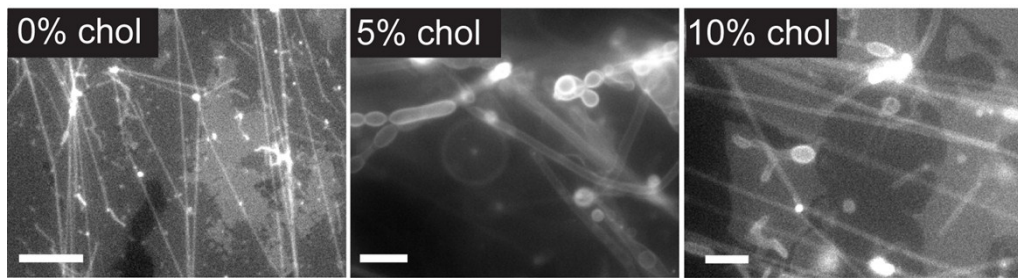

**Figure S3.** Fluorescence images showing lipid tubules formed from SOPC lipids (0% chol) and SOPC/cholesterol mixtures as indicated. Scale bars:  $20 \mu\text{m}$ .
